# Supplementary material for: How Does Radiation Affect Curcumin Raw Material?
Source: MDPI journal article supplement (doi:10.3390/ijms25052524), 2024-02-21
Supplement: s1 [file s1]

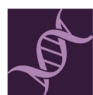

*Supplementary materials*

# How does radiation affect curcumin raw material?

Natalia Rosiak<sup>1</sup>, Ewa Garbiec<sup>1</sup>, Waldemar Bednarski<sup>2</sup>, Robert Skibiński<sup>3</sup>, Kornelia Lewandowska<sup>2</sup>, Aleksandra Bazan-Woźniak<sup>4</sup>, Robert Pietrzak<sup>4</sup>, Judyta Cielecka-Piontek<sup>1,\*</sup>, Przemysław Zalewski<sup>1</sup>

1 Department of Pharmacognosy and Biomaterials, Poznan University of Medical Sciences, Rokietnicka 3, 60-806 Poznan, Poland

2 Institute of Molecular Physics, Polish Academy of Sciences, Smoluchowskiego 17, 60-179, Poznan, Poland

3 Department of Medicinal Chemistry, Medical University of Lublin, Jaczewskiego 4, 20-090 Lublin, Poland

4 Faculty of Chemistry, Adam Mickiewicz University in Poznan, Uniwersytetu Poznańskiego 8, 61-614 Poznan, Poland

\* Correspondence: jpiontek@ump.edu.pl

**Table S1.** Selected characteristic vibronic features of curcumin theory with application of 6-31G(d,p) basis and experiment bands of curcumin. s-stretching, b-bending, w-wagging, r-rocking, t-twisting, oop-outside of the plane, def. - deformation.

| Calculation<br>(cm <sup>-1</sup> ) | Experimental<br>(cm <sup>-1</sup> ) | Band assignment                                |
|------------------------------------|-------------------------------------|------------------------------------------------|
| 561                                | 470                                 | Def. all molecule                              |
| 582                                | 548                                 | Def. all molecule                              |
| 823                                | 815                                 | Def. benzene rings                             |
| 855                                | 846                                 | C-H w                                          |
| 865                                | 872                                 | C-H w                                          |
| 968                                | 967                                 | Def. all molecule                              |
| 1038                               | 1030                                | C-H w                                          |
| 1069                               | 1064                                | CH <sub>2</sub> t + C-O s + def. benzene rings |
| 1154                               | 1126                                | C-C s                                          |
| 1198                               | 1166                                | C-H w                                          |
| 1238                               | 1208                                | C-O-H b + C-H r                                |
| 1270                               | 1243                                | C-O s + C-O-H b + C-H r + CH <sub>2</sub> t    |
| 1320                               | 1283                                | C-O s + C-H r                                  |
| 1426                               | 1373                                | C-O-H b + C-C s in benzene rings               |
| 1470                               | 1429                                | C-H r                                          |
| 1502                               | 1457                                | C-H w in CH <sub>3</sub>                       |
| 1519                               | 1465                                | C-H r in CH <sub>3</sub>                       |
| 1564                               | 1514                                | C-O s + C-C s                                  |
| 1635                               | 1560                                | C-C s + C-O-H b + C-H r                        |
| 1655                               | 1577                                | C=C s + C-C s + C-O-H b                        |
| 1674                               | 1597                                | C=C s                                          |
| 1749                               | 1628                                | C=O s + C=C s                                  |
| 3025                               | 2841                                | C-H s in CH <sub>3</sub>                       |
| 3156                               | 2941                                | C-H s                                          |
| 3760                               | 3440                                | O-H s                                          |

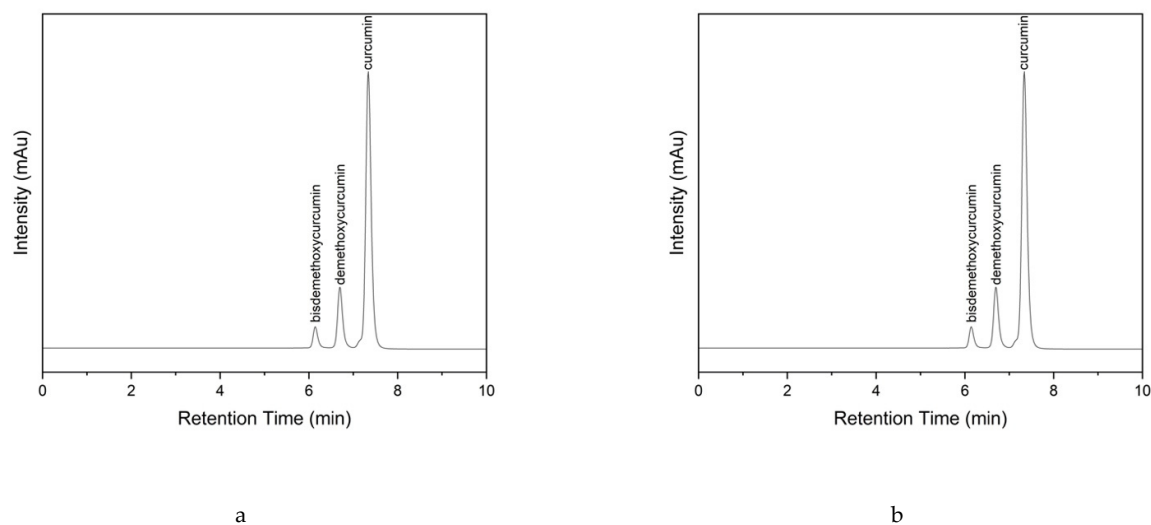

**Figure S1.** The HPLC-DAD analysis of non-irradiated (a) and irradiated (b) sample (assay  $\geq 65\%$  of curcuminoids).

**Table S2.** Validation parameters of HPLC-DAD method.

| Curcumin                    |                                                |
|-----------------------------|------------------------------------------------|
| Parameter                   | Curcumin dissolved in mobile phase             |
| Injection volume            | 20 $\mu$ l                                     |
| Linearity range (mg/mL)     | 0.0001 – 0.2                                   |
| Correlation coefficient (r) | 0.9999                                         |
| a $\pm$ Sa                  | 164512465 $\pm$ 1458461                        |
| b $\pm$ Sb                  | insignificant ( $\alpha=0.05$ )                |
| LOD (mg/mL)                 | 0.0025                                         |
| LOQ (mg/mL)                 | 0.0076                                         |
| Demethoxycurcumin           |                                                |
| Parameter                   | Demethoxycurcumin dissolved in mobile phase    |
| Injection volume            | 20 $\mu$ l                                     |
| Linearity range (mg/mL)     | 0.0001 – 0.2                                   |
| Correlation coefficient (r) | 0.9998                                         |
| a $\pm$ Sa                  | 142586247 $\pm$ 1346285                        |
| b $\pm$ Sb                  | insignificant ( $\alpha=0.05$ )                |
| LOD (mg/mL)                 | 0.0027                                         |
| LOQ (mg/mL)                 | 0.0081                                         |
| Bisdemethoxycurcumin        |                                                |
| Parameter                   | Bisdemethoxycurcumin dissolved in mobile phase |
| Injection volume            | 20 $\mu$ l                                     |
| Linearity range (mg/mL)     | 0.0001 – 0.2                                   |
| Correlation coefficient (r) | 0.9997                                         |
| a $\pm$ Sa                  | 172157465 $\pm$ 1254585                        |
| b $\pm$ Sb                  | insignificant ( $\alpha=0.05$ )                |
| LOD (mg/mL)                 | 0.0023                                         |
| LOQ (mg/mL)                 | 0.0074                                         |

**Table S3.** Antioxidant method performance parameters - limits of detection (LOD) and quantification (LOQ).

| Assay         | LOD (mg/mL) | LOQ (mg/mL) |
|---------------|-------------|-------------|
| ABTS 0 kGy    | 0.0031      | 0.0093      |
| ABTS 25 kGy   | 0.0030      | 0.0090      |
| CUPRAC 0 kGy  | 0.0009      | 0.0027      |
| CUPRAC 25 kGy | 0.0002      | 0.0007      |
| DPPH 0 kGy    | 0.0031      | 0.0095      |
| DPPH 25 kGy   | 0.0043      | 0.0131      |
| FRAP 0 kGy    | 0.0004      | 0.0011      |
| FRAP 0 kGy    | 0.0003      | 0.0008      |

0 kGy - non-irradiated CUR; 25 kGy - irradiated CUR
